# Supplementary material for: Dimensional heterostructures of 1D CdS/2D ZnIn2S4 composited with 2D graphene: designed synthesis and superior photocatalytic performance
Source: Royal Society of Chemistry journal article supplement (doi:10.1039/c7dt00018a), 2017-01-01
Supplement: c7dt00018a1.pdf [file c7dt00018a1.pdf]

# Dimensional Heterostructure of 1D CdS/ 2D ZnIn<sub>2</sub>S<sub>4</sub> Composited with 2D Graphene: Designed Synthesis and Superior Photocatalytic Performance

*Qingyong Tian<sup>a</sup>, Wei Wu<sup>a, b\*</sup>, Jun Liu<sup>a</sup>, Zhaohui Wu<sup>c</sup>, Weijing Yao<sup>a</sup>, Jin Ding<sup>a</sup>,*

*Changzhong Jiang<sup>a\*</sup>*

<sup>a</sup> School of Physics and Technology and School of Printing and Packaging, Wuhan  
University, Wuhan 430072, P. R. China.

<sup>b</sup> Suzhou Research Institute of Wuhan University, Suzhou 215000, P. R. China.

<sup>c</sup> Department of Biological Engineering and Environment Science Department,  
Changsha University, Changsha 410005, P. R. China

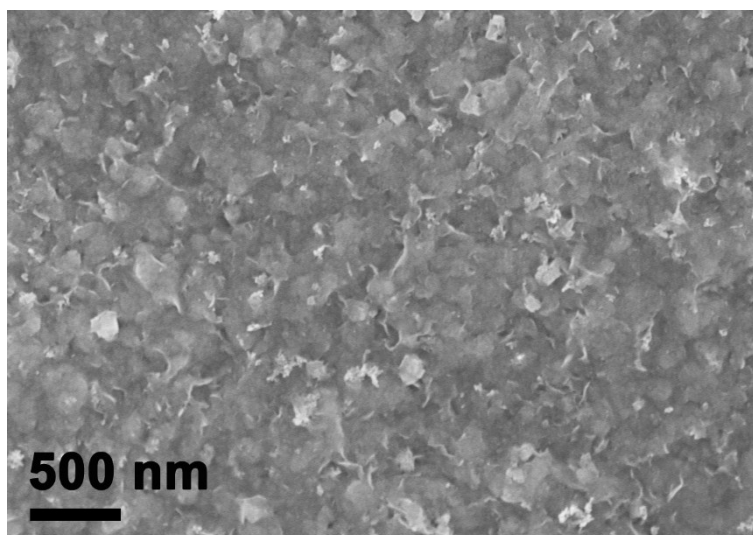

**Figure S1** The (a) SEM image of pure ZnIn<sub>2</sub>S<sub>4</sub> nanosheets.

---

\*To whom correspondence should be addressed. Tel: +86-27-68778529. Fax: +86-27-68778433. E-mail: [weiwu@whu.edu.cn](mailto:weiwu@whu.edu.cn) (W. Wu) and [czjiang@whu.edu.cn](mailto:czjiang@whu.edu.cn) (C. Jiang).

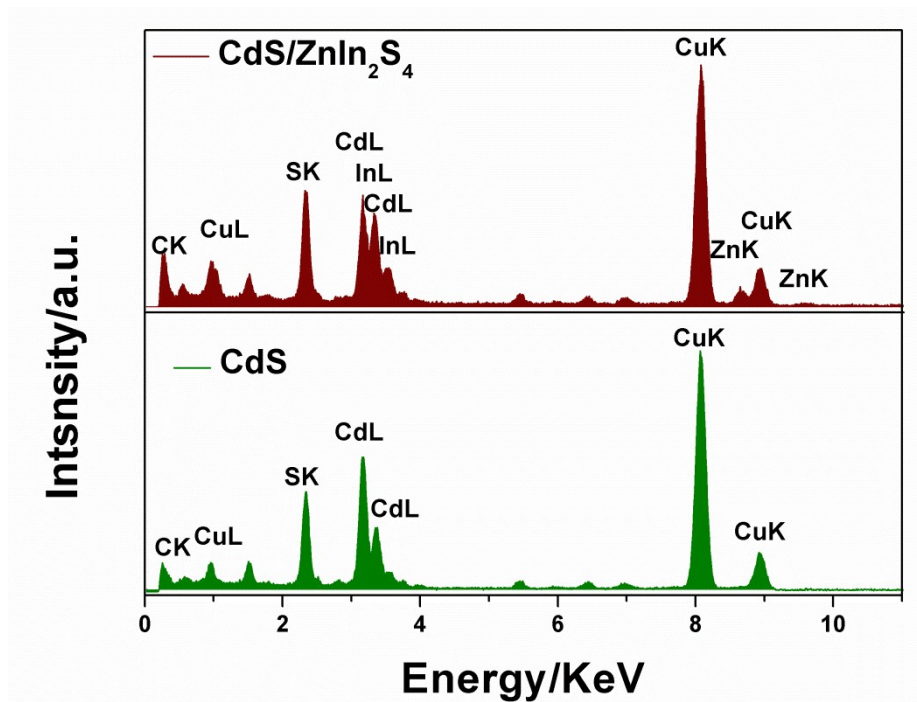

**Figure S2** EDX spectrum of CdS (green) nanowires and CdS/ZnIn<sub>2</sub>S<sub>4</sub> (red) helical DHS.

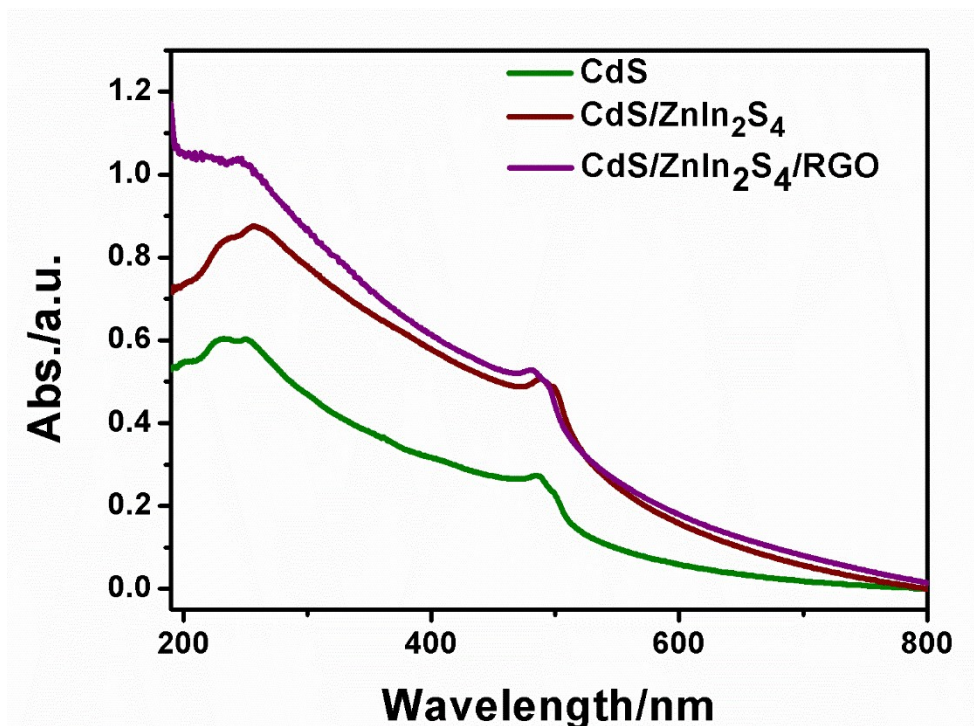

**Figure S3** UV-vis absorption spectra of CdS nanowires, CdS/ZnIn<sub>2</sub>S<sub>4</sub> helical DHS and CdS/ZnIn<sub>2</sub>S<sub>4</sub>/RGO composites

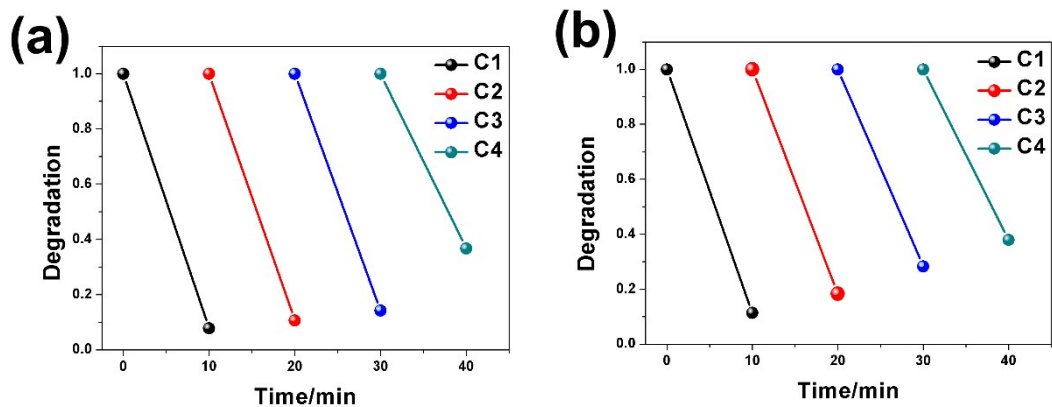

**Figure S4** Degradability of 4 cycling runs for photocatalytic degradation of MG in the presence of (a) CdS nanowires and (b) CdS/ZnIn<sub>2</sub>S<sub>4</sub> helical DHS photocatalysts.

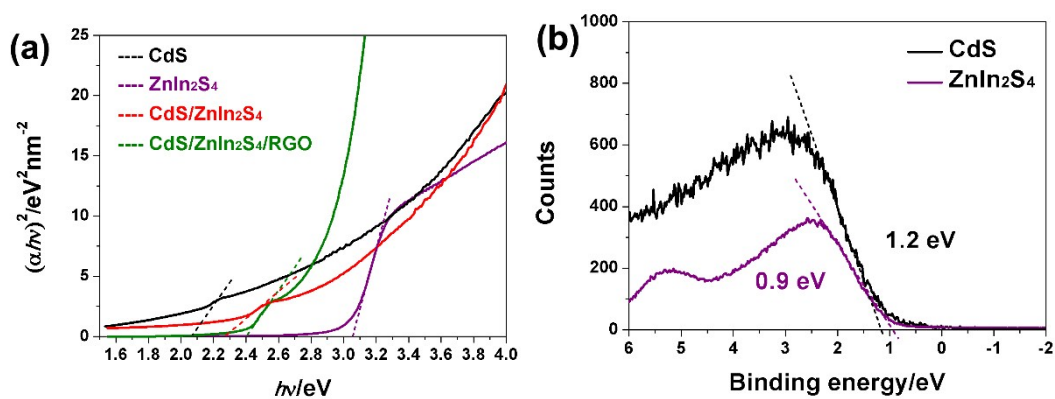

**Figure S5** (a) Typical plot of  $(\alpha h\nu)^2$  versus photon energy ( $h\nu$ ) for the CdS nanowires, ZnIn<sub>2</sub>S<sub>4</sub> nanosheets, CdS/ZnIn<sub>2</sub>S<sub>4</sub> helical DHS and CdS/ZnIn<sub>2</sub>S<sub>4</sub>/RGO composites, (b) XPS valence band spectra for CdS nanowires and ZnIn<sub>2</sub>S<sub>4</sub> nanosheets.
